# Supplementary material for: Single-user MIMO versus multi-user MIMO in distributed antenna systems with limited feedback
Source: Springer Nature journal article supplement (doi:10.1186/1687-6180-2013-54), 2013-03-19

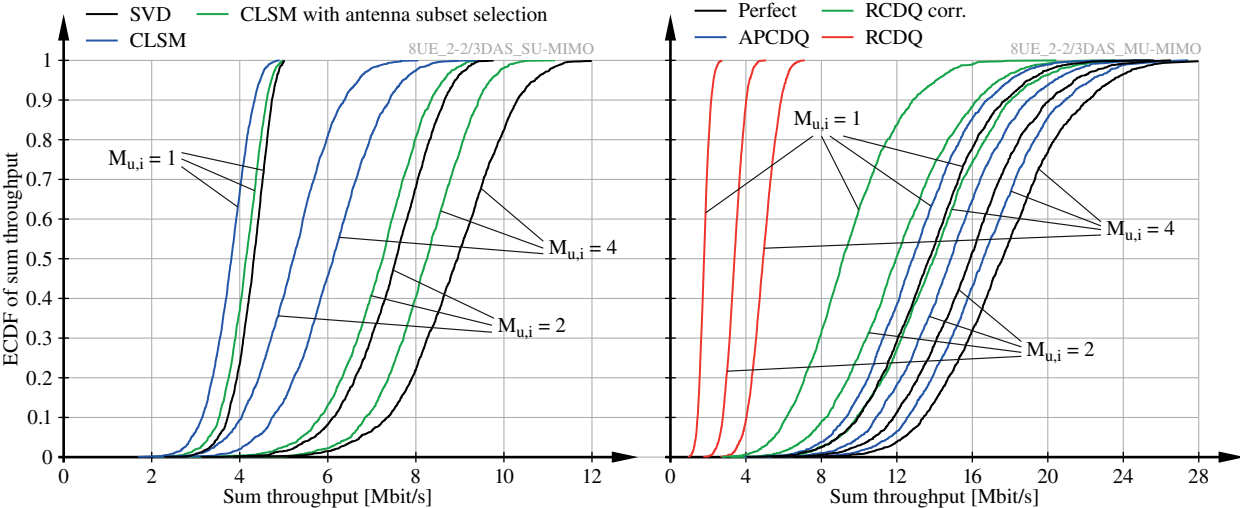

Supplement: 13634_2012_505_MOESM4_ESM.pdf [file 13634_2012_505_MOESM4_ESM.pdf]
